# Supplementary material for: High Throughput Phenotypic Analysis of Mycobacterium tuberculosis and Mycobacterium bovis Strains' Metabolism Using Biolog Phenotype Microarrays
Source: PLoS One. 2013 Jan 10;8(1):e52673. doi: 10.1371/journal.pone.0052673 (PMC3542357; doi:10.1371/journal.pone.0052673)
Supplement: Table S11 — Plates PM1 to PM4: Wells with significantly different dye reduction within M .bovis spoligotypes. Data for wells for which P<0.05, there are at least 2-fold differences, and at least one strain has a mean value of at least 3 Omnilog units are summarised here. (XLS) [file pone.0052673.s020.xls]

## Sheet: within M. bovis spoligotypes
Supplementary Table S11. Plates PM1 to PM4: Wells with significantly different dye reduction between M .bovis spoligotypes
Notes: Code (corresponds with Table 1/clustering): 9a= type 9 61/0038/01; 9b= type 9 AF2122/97; 17c=type 17 21/7917/05; 35a=type 35 61/1307/01
"all"= all the values from this spoligotype were pooled to give the values under this heading and t-tests were carried out on these pooled values as well as values from strains 9b and 17c.
Notes for t-tests :t-tests: **P<0.01, *P<0.05. Differences in dye reduction were all >5 fold except those marked 2 which were 2-5 fold.
48-165 means differences were only significant for dye reduction from 48h to 165 h; for others differences were significant for dye reduction from 0 to 165h as well as from 48h to 165h
if value= 0 or <0 in one of a pair, "zero" indicates this- see notes column for the strain with the lower (zero) value. See Supplementary Table 3 for Omnilog units.
			9a/9b	9a/9c	9b/9c	9a vs 9b		9a vs 9c		9b vs 9c		17b/17c	17b vs 17c
Plate	Location	Chemical	all ratios are from values for 48-165h readings
						P	notes	P	notes	P	notes		P	notes
PM01	A03	N-Acetyl-D-Glucosamine			16.25					*	9b>9c
PM01	B01	D-Serine	0.351351			*2	9b>9c
PM01	B03	Glycerol	zero		25.8	**	9b>9a			**	9b>9c
PM01	D01	L-Asparagine										zero	*2	17c>17b
PM01	E05	Tween 80	0.114286			*	9b>9a
PM01	F07	Propionic acid	0.223776			**2	9b>9a
PM01	G09	Mono-Methylsuccinate										0.271186	*2	17c>17b,48-165
PM02A	D06	D-Tagatose	7			*	9b>9a,48-165
PM03B	B10	L-Serine										0.14	*	17c>17b
PM03B	D10	Ethylenediamine										0.11	**	17c>17b
PM03B	E08	D-Glucosamine										0.16	*	17c>17b
PM04A	F05	Thiophosphate	zero			*2	9a>9b
